# Supplementary material
Source: Elsevier journal article supplement (https://www.sciencedirect.com/science/article/pii/S0210569117300591)
Supplement: mmc1 [file S0210569117300591:mmc1.pdf]

ENCUESTA PARA CONOCER LOS  
**INDICADORES DE CALIDAD BIOÉTICOS**  
**DE LOS SERVICIOS DE MEDICINA INTENSIVA**  
GRUPO DE TRABAJO DE BIOÉTICA-SEMICYUC

**1. TIPO DE HOSPITAL (MARCAR SOLO UNA):**

- a). Público
- b). Privado
- c). Concertado

**2. DOCENCIA EN EL HOSPITAL (MARCAR VARIOS SI PROCEDE):**

**A. Universitaria de grado**

- a). Medicina
- b). Enfermería
- c). No formación grado

**B. Universitaria de postgrado**

- a). No formación MIR
- b). Formación MIR de M. Intensiva
- c). Rotación MIR de otras especialidades.
- d). Formación Enfermería de Postgrado

**3. NÚMERO TOTAL DE CAMAS DEL S.M.I.:**

**4. NÚMERO TOTAL DE CAMAS DEL HOSPITAL:**

**5. NÚMERO DE PERSONAL ADSCRITO AL S.M.I.:**

- a). Médicos especialistas de staff:
- b). MIR de M. Intensiva (incluyendo los que estén rotando en otros servicios):
- c). Diplomados en Enfermería:
- e). Auxiliares de Clínica:

Los **indicadores de calidad en relación con la Bioética**, elaborados por la SEMICYUC y actualizados en 2011, son el objeto de evaluación en ésta encuesta. Marcar la respuesta adecuada en cada ítem.

### **1.-Adecuación de los cuidados al final de la vida (indicador nº 96).**

Tras la decisión de LTSV, se aplica un protocolo de Cuidados de Final de Vida (CFV) que define el proceso de transición del tratamiento activo al paliativo.

#### **a) Protocolo de CFV que incluye LTSV**

- ☐ a1. El SMI dispone de protocolo de CFV que incluye protocolo de LTSV.
- ☐ a2. El SMI no dispone de protocolo de CFV que incluye protocolo de LTSV.

#### **b) Toma de decisión en el SMI**

- ☐ b1. Se hace efectiva por el médico responsable del paciente
- ☐ b2. Se efectúa por consenso facultativo y participación de Enfermería

### **2.-Información a familiares de los enfermos ingresados en el SMI (indicador nº 97, relevante).**

La información a los enfermos es un derecho regulado por la legislación actual. Un porcentaje importante de enfermos críticos son incompetentes por lo que esta información en muchas ocasiones debe darse a la familia o allegados. En el caso de los enfermos del SMI dada la gravedad y la variabilidad de la situación clínica, esta información debe cumplir una serie de requisitos:

#### **a) En el SMI la información es:**

- ☐ a1. Diaria, incluyendo fines de semana y festivos
- ☐ a2. Diaria en laborables y fines de semana/festivos, sólo a los ingresos

#### **b) Lugar de información:**

- ☐ b1. Se realiza en un sitio confortable y con suficiente privacidad.
- ☐ b2. No existe sala específica para información

#### **c) El médico informante:**

- ☐ c1. Es el médico responsable del paciente.
- ☐ c2. Siempre es el médico de guardia el que asume la información.

#### **d) Registro de la información en la Historia Clínica:**

- ☐ d1. Habitualmente se registra la información facilitada en la HC
- ☐ d2. Habitualmente no se registra la información facilitada en la HC

### **3.-Incorporación de las instrucciones previas-IP (voluntades anticipadas-VA) en la toma de decisiones (indicador nº 98).**

Los documentos de IP o VA, facilitan el proceso de toma de decisiones en los enfermos que no pueden expresar sus preferencias.

- ☐ a) En el SMI, es práctica habitual, documentar por el médico responsable que se ha explorado la existencia o no de IP o VA en los pacientes incompetentes. Todo el personal médico conoce la aplicación de VA de su Comunidad Autónoma y el RNIP (registro nacional)
- ☐ b) En el SMI no se documenta la existencia o no de IP o VA.

### **4.- Cumplimentación de los Documentos de Consentimiento Informado-DCI (indicador nº99).**

El grupo de Bioética de la SEMICYUC recomienda una serie de procedimientos tributarios de DCI y cuya ausencia vulnera el derecho de autonomía del paciente. Son los enumerados a continuación. *Dejar en blanco cada apartado, si no existe el DCI específico; en el apartado i) se indica si el DCI habitual es el genérico.*

- a) DCI de Traqueostomía:
  - ☐ a1. El SMI dispone de dicho DCI
  - ☐ a2. El SMI no dispone de dicho DCI
- b) DCI de técnicas de depuración extrarrenal:
  - ☐ b1. El SMI dispone de dicho DCI
  - ☐ b2. El SMI no dispone de dicho DCI
- c) DCI de marcapasos no urgentes:
  - ☐ c1. El SMI dispone de dicho DCI
  - ☐ c2. El SMI no dispone de dicho DCI
- d) DCI de Plasmaféresis:
  - ☐ d1. El SMI dispone de dicho DCI
  - ☐ d2. El SMI no dispone de dicho DCI
- e) DCI de trasfusión de hemoderivados no urgente:
  - ☐ e1. El SMI dispone de dicho DCI
  - ☐ e2. El SMI no dispone de dicho DCI
- f) DCI de intervención quirúrgica urgente:
  - ☐ f1. El SMI dispone de dicho DCI
  - ☐ f2. El SMI no dispone de dicho DCI
- g) DCI de Angiografías (coronarias , SNC, y otras):
  - ☐ g1. El SMI dispone de dicho DCI
  - ☐ g2. El SMI no dispone de dicho DCI
- h) El SMI dispone de otros DCI como son:

- 
- i) DCI genérico en el que se especifica el procedimiento a realizar:
    - ☐ h1. El SMI utiliza habitualmente DCI genérico y especifica el procedimiento
    - ☐ h2. El SMI no usa DCI genérico

**5.-Limitación de Tratamientos de Soporte Vital--LTSV (indicador nº 100, relevante).**

Formulario de LTSV que se cumplimenta como orden médica y figura en la Documentación clínica:

- ☐ a El SMI dispone de dicho formulario.
- ☐ b El SMI no dispone de formulario de LTSV.

**6.-Uso de medidas de contención físicas y/o medicamentosas (indicador nº 101).**

Suelen aplicarse, bien, por seguridad del propio paciente o para evitar daños al equipo asistencial. La prescripción ha de ser facultativa. El protocolo debe, incluir como mínimo, tipos de contención, indicaciones y seguimiento de los pacientes.

- ☐ a) El SMI dispone de protocolo específico de medidas de contención.
- ☐ b) El SMI no dispone de protocolo específico de medidas de contención

**Por último, interesa conocer si algún miembro del SMI forma parte del Comité de Bioética Asistencial (CBA) del hospital.**

- ☐ a). En el CBA hay algún facultativo del SMI.
- ☐ b). En el CBA hay algún miembro del personal de Enfermería del SMI.
- ☐ c). En el CBA ha formado parte algún miembro del SMI; no en la actualidad.
- ☐ d). En el CBA no hay representación del SMI.
