# Supplementary material
Source: Elsevier journal article supplement (https://www.sciencedirect.com/science/article/pii/S0210569117300591)
Supplement: mmc2 [file S0210569117300591:mmc2.docx]

COMUNIDAD VALENCIANA

1. Hospital Comarcal de Vinaroz (Castellón)
2. Hospital General Universitario de Castellón
3. Hospital Provincial de Castellón
4. Hospital de la Plana (Villarreal – Castellón)
5. Hospital de Sagunto (Valencia)
6. Hospital Universitario Doctor Peset (Valencia)
7. Hospital Universitario y Politécnico La Fe (Valencia)
8. Hospital Arnau de Vilanova (Valencia)
9. Hospital Clínico Universitario de Valencia
10. Hospital de Manises (Valencia)
11. Hospital General de Requena (Valencia)
12. Hospital Francesc de Borja de Gandía (Valencia)
13. Hospital General Universitario de Elda (Alicante)
14. Hospital Universitario de San Juan (Alicante)
15. Hospital Universitario de Torrevieja (Alicante)

MADRID

1. Hospital Universitario Príncipe de Asturias, de Alcalá de Henares
2. Hospital Universitario del Tajo, de Aranjuez
3. Hospital Universitario Puerta de Hierro, de Majadahonda
4. Hospital Universitario Fundación Jiménez Díaz, de Madrid
5. Hospital Universitario del Sureste, de Arganda del Rey
6. Hospital Universitario Infanta Leonor, de Madrid
7. Hospital Universitario de Getafe
8. Hospital Universitario de la Princesa, de Madrid
9. Hospital Universitario infanta Sofía, de San Sebastián de los Reyes
10. Hospital Universitario de Torrejón, de Torrejón de Ardoz

CATALUÑA

1. Hospital de la Santa Creu i Sant Pau (Barcelona)
2. Hospital Universitari Sagrat Cor (Barcelona)
3. Hospital Universitari de Bellvitge (Barcelona)
4. Hospital Universitari Joan XXIII (Tarragona)
5. Hospital Sant Joan de Deu, Fundació Althaïa (Manresa, Barcelona)
6. Clínica Nostra Senyora del Remei (Barcelona)
7. HLA Clínica Perpetuo Socorro (Lleida)
8. Hospital Universitari Vall d´Hebrón (Barcelona)
9. Hospital d´Igualada (Barcelona)
10. Consorci Sanitari del Maresme, Hospital de Mataró (Barcelona)

ANDALUCÍA

1. Complejo Hospitalario de Torrecárdenas (Almería)
2. Hospital de Antequera (Málaga)
3. Hospital Universitario de Puerto Real (Cádiz)
4. Hospital Universitario Virgen de la Victoria (Málaga)
5. Hospital Universitario San Cecilio (Granada)
6. Hospital de Poniente de El Egido (Almería)
7. Hospital General de Jerez de la Frontera (Cádiz)

CASTILLA – LA MANCHA

1. Hospital Virgen de la Luz (Cuenca)
2. Hospital Santa Bárbara, Puertollano (Ciudad Real)
3. Hospital Virgen de la Salud de Toledo
4. Hospital Universitario de Guadalajara
5. Hospital de Hellín (Albacete)

BALEARES

1. Hospital de Sont LLàtzer (Mallorca)
2. Policlínica Miramar (Mallorca)
3. Hospital Quirónsalud Palmaplanas (Mallorca)
4. Complex Sanitari de Llevant (Mallorca)

MURCIA

1. Hospital General Universitario Morales Meseguer
2. Hospital Clínico Universitario Virgen de la Arrixaca

EXTREMADURA

1. Hospital Comarcal Don Benito-Villanueva de la Serena (Badajoz)
2. Hospital San Pedro de Alcántara (Cáceres)

GALICIA

1. Hospital Universitario Lucus Augusti (Lugo)
2. Complejo Hospitalario Universitario de Orense

CASTILLA – LEÓN

1. Hospital Universitario de Salamanca

ASTURIAS

1. Hospital Universitario Central de Asturias

FEDERACIÓN NORTE

1. Hospital de Galdakao (Vizcaya)
2. Hospital Universitario Donostia (Guipúzcoa)
3. Hospital Universitario Araba - Txagorritxu Vitoria (Álava)
4. Hospital Universitario Marqués de Valdecilla (Cantabria)
5. Hospital de San Pedro de Logroño (La Rioja)
